# Supplementary material for: Identification and characterization of cancer stem cells in human head and neck squamous cell carcinoma
Source: PubMed Central journal article supplement (PMC4008349; doi:10.1186/1471-2407-14-173), 2014-03-11
Supplement: 1471-2407-14-173-S1.pdf [file 1471-2407-14-173-S1.pdf]

**Table 1S. Selected gene primers for qRT-PCR**

| <b>Target</b> | <b>Forward Primer</b>                      | <b>Reverse Prime</b>                        |
|---------------|--------------------------------------------|---------------------------------------------|
| ALDH1         | TCACAGGATCAACAGAG                          | GTAGAATACCCATGGTGTGC                        |
| BMI1          | AGGTGACACTATAGAATACAGAAAT<br>GCATCGAACAACG | GTACGACTCACTATAGGGAGCTGGTCT<br>CCAGGTAACGAA |
| Nanog         | AGGTGACACTATAGAATATCAGCAC<br>CTACCTACCCCAG | GTACGACTCACTATAGGGAGAATTTGG<br>CTGGAACTGCAT |
| CD133         | AGGTGACACTATAGAATAGTGAAAA<br>CTAGCCTGCGGTC | GTACGACTCACTATAGGGAGGCCATCC<br>AAATCTGTCCTA |
| Oct3/4        | CTTGCTGCAGAAGTGGGTGGAGGAA                  | CTGCAGTGTGGGTTTCGGGCA                       |
| Sox2          | ATGTACAACATGATGGAGACG                      | GCGCTTGCTGATCTCCGAGT                        |
